## Asymmetric leaflet tethering is associated with worse outcomes after edge-to-edge mitral valve repair for secondary mitral regurgitation

L. Stolz<sup>1</sup>, M. Orban<sup>1</sup>, D. Braun<sup>1</sup>, P. Doldi<sup>1</sup>, M. Orban<sup>1</sup>, T. Stocker<sup>1</sup>, M. Mehr<sup>1</sup>, J. Steffen<sup>1</sup>, K. Loew<sup>1</sup>, C. Hagl<sup>2</sup>, S. Massberg<sup>1</sup>, M. Naebauer<sup>1</sup>, J. Hausleiter<sup>1</sup>

<sup>1</sup>Clinic of the University of Munich Großhadern, Medizinische Klinik und Poliklinik I, Munich, Germany; <sup>2</sup>Clinic of the University of Munich Großhadern, Herzchirurgische Klinik und Poliklinik, Munich, Germany

**Funding Acknowledgement:** Type of funding sources: None.

**Background:** The impact of mitral valve (MV) tethering patterns on outcomes of patients undergoing transcatheter edge-to-edge mitral valve repair (TEER) for severe secondary mitral regurgitation (SMR) is unknown.

**Purpose:** The purpose of this study was to evaluate the impact of asymmetric postero-anterior and medio-lateral MV leaflet tethering on procedural and survival outcomes after TEER for SMR.

**Methods:** Symmetry of postero-anterior tethering was defined as the ratio of the posterior to anterior MV leaflet angle (PLA/ALA) in the central MV segment 2. The ratio of the tenting area between MV segments 3 and 1 (S3/S1 ratio) was defined as medio-lateral tethering symmetry. We used receiver operating characteristics and a proportional Cox model to identify cut-off values of asymmetric postero-anterior and medio-lateral tethering for prediction of two-year survival after TEER.

**Results:** 178 patients receiving TEER for SMR were included. Asymmetric

postero-anterior tethering was observed in 67 patients (37.6%, PLA/ALA ratio cut-off >1.54). Medio-lateral tethering was asymmetric in 49 patients (27.5%, S3/S1 ratio cut-off >1.49). MR was reduced to MR ≤2+ in 91.6% of patients, while postprocedural MR remained higher in the presence of asymmetric postero-anterior tethering (p=0.01). After adjustment for potential clinical and echocardiographic confounders, multivariable Cox regression analysis confirmed asymmetric postero-anterior tethering (HR=2.77, CI=1.43–5.38, p<0.01) and asymmetric medio-lateral tethering (HR=2.90, CI=1.54–5.45, p<0.01) as independent predictors for two-year survival.

**Conclusions:** Asymmetric postero-anterior and medio-lateral MV leaflet tethering patterns independently increase two-year all-cause mortality in patients undergoing TEER for SMR. Detailed echocardiographic patient selection might improve outcomes after TEER.

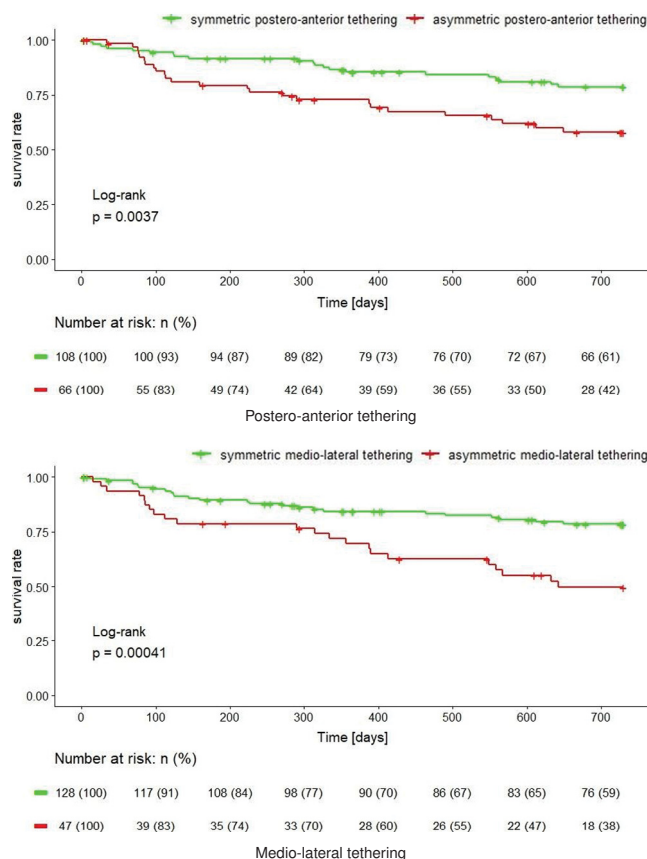

Source: http://academic.oup.com/eurheartj/article-pdf/42/Supplement_1/ehab724.2218/40596756/ehab724.2218.pdf
